# Supplementary material for: Muscle-specific regulation of right ventricular transcriptional responses to chronic hypoxia-induced hypertrophy by the muscle ring finger-1 (MuRF1) ubiquitin ligase in mice
Source: Springer Nature journal article supplement (doi:10.1186/s12881-018-0670-1), 2018-09-21
Supplement: MOESM3 [file 16143402]

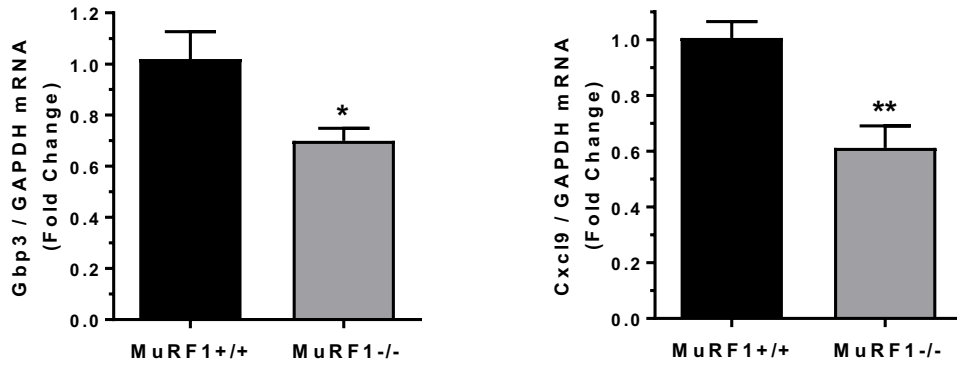

**Supplemental Figure 1. Validation of differential expressed genes in *MuRF1*<sup>-/-</sup> hearts.** Reverse transcriptase quantitative PCR analysis of *MuRF1*<sup>-/-</sup> hearts of differentially expressed genes *Gbp3* and *Cxcl9* mRNA in the right ventricle.
