# Supplementary material for: Muscle-specific regulation of right ventricular transcriptional responses to chronic hypoxia-induced hypertrophy by the muscle ring finger-1 (MuRF1) ubiquitin ligase in mice
Source: Springer Nature journal article supplement (doi:10.1186/s12881-018-0670-1), 2018-09-21
Supplement: MOESM5 [file 16143402]

## Hypoxia-induced Right Heart Failure (vs. Normoxia controls)

**A** Top 50 Genes Increased (>4.9 fold)

| Gene.symbol | logFC     |
|-------------|-----------|
| Acbd3       | 7.7399098 |
| Anks6       | 7.4512372 |
| Lyplal1     | 7.3525136 |
| Syt9        | 7.3075573 |
| Olr601      | 7.2756361 |
| Olr665      | 7.1268722 |
| Afm         | 6.7279746 |
| Nr3c1       | 6.6294987 |
| Cmtm3       | 6.5814714 |
| Ankle2      | 6.529752  |
| Tbr1        | 6.4051254 |
| Prss21      | 6.3764999 |
| Cyp1a1      | 6.356943  |
| Olr1435     | 6.3283155 |
| Olr456      | 6.2585462 |
| Slc46a2     | 6.240707  |
| Chodl       | 6.2322086 |
| Asip        | 6.1616372 |
| Ifnk        | 5.903773  |
| Abcb1a      | 5.8294556 |
| Hmmr        | 5.780133  |
| Kif3c       | 5.6894731 |
| Cabp5       | 5.6881792 |
| Akap11      | 5.6510136 |
| Vom2r65     | 5.6499162 |
| Slc22a8     | 5.6490462 |
| Micu3       | 5.6447986 |
| Muc3        | 5.6226814 |
| St18        | 5.6049835 |
| RGD1563222  | 5.5372526 |
| Ddr1        | 5.4703543 |
| Hcrtr2      | 5.3809926 |
| Nipsnap3b   | 5.3559893 |
| Olr1637     | 5.3303087 |
| Kcnf1       | 5.311148  |
| Olr1405     | 5.1979302 |
| RGD1309995  | 5.1728245 |
| Zfat        | 5.1593694 |
| Etnk1       | 5.1479151 |
| Mapk6       | 5.1012051 |
| Gpx2        | 5.08466   |
| RGD1308544  | 5.0699919 |
| Lrrc6       | 5.0571202 |
| Aqp4        | 5.0495376 |
| Olr1739     | 5.0260437 |
| Papd4       | 5.0139808 |
| Serpib8     | 5.0060356 |
| Hspa12a     | 5.0039469 |
| P2rx2       | 4.9947203 |
| Olr655      | 4.9889469 |

**B** Top 50 Genes Decreased (< -3.9 fold)

| Gene.symbol | logFC      |
|-------------|------------|
| Gira4       | -3.9443876 |
| Ryr2        | -3.9565372 |
| Ppargc1a    | -3.9571665 |
| Slc30a3     | -3.9704991 |
| Pla2g5      | -3.9990494 |
| Kif5a       | -4.0163281 |
| Syt1        | -4.0505071 |
| Apcs        | -4.0612704 |
| Myzap       | -4.0772834 |
| Mpo         | -4.0889497 |
| Dab1        | -4.1061027 |
| Ophn1       | -4.1318639 |
| Cxxc4       | -4.1365402 |
| Zfp362      | -4.1560058 |
| Lynx1       | -4.1604026 |
| Wdr93       | -4.2234658 |
| Scgn        | -4.2503407 |
| Olr357      | -4.2533781 |
| Rhpn2       | -4.2538903 |
| Nmnat1      | -4.2707181 |
| Gap43       | -4.2881502 |
| Olr1273     | -4.3011472 |
| Hmgcs2      | -4.3081376 |
| Cartpt      | -4.3303303 |
| Slc14a1     | -4.3336196 |
| Mcmdc2      | -4.3498964 |
| Slc22a3     | -4.450574  |
| Ptpst1      | -4.4890443 |
| Ncbp1       | -4.5025758 |
| Sun2        | -4.5250063 |
| Tcf7l1      | -4.6203004 |
| Ar          | -4.6256036 |
| Dcdc2       | -4.6454874 |
| Drd1        | -4.6749575 |
| Kcng2       | -4.6806576 |
| Ebp         | -4.7454553 |
| Arhgap36    | -4.9438548 |
| Gng12       | -4.9697361 |
| Utp20       | -5.0410298 |
| Agpat3      | -5.1121833 |
| Ryr2        | -5.2709372 |
| Pcdh12      | -5.2869936 |
| Cartpt      | -5.3539069 |
| Sox6        | -5.3618295 |
| Glyat       | -5.4572406 |
| Fhl5        | -5.5295489 |
| Acvr1c      | -6.2015081 |
| Pja2        | -6.4006704 |
| Poteg       | -6.694906  |
| Tsga10      | -7.7642788 |

**Supplemental Figure 3. Top differentially expressed genes by microarray analysis of right ventricle tissue in rats challenged with pulmonary hypertension-induced right heart failure. A.** Top 50 genes increased compared to normoxia controls. **B.** Top 50 genes decreased compared to normoxia controls. Data downloaded from Gene Expression Omnibus (GEO) GEO2R interface including the 8 normoxia right ventricle replicates (6 biological replicates) and 12 hypoxia right ventricle replicates (6 biological replicates). 43,480 data points were downloaded, with 25,241 named. The top 50 genes here were used in further analysis of related transcription factors. Data published in Drake, et al., *Physiol Genomics* 2013 45(12):449-61.
