# Supplementary material for: Muscle-specific regulation of right ventricular transcriptional responses to chronic hypoxia-induced hypertrophy by the muscle ring finger-1 (MuRF1) ubiquitin ligase in mice
Source: BMC Med Genet. 2018 Sep 21;19:175. doi: 10.1186/s12881-018-0670-1 (PMC6150973; doi:10.1186/s12881-018-0670-1)
Supplement: Supplementary file 2 — Table S2. Differentially expressed genes in MuRF1 Tg + mice challenged with hypoxia (XLSX 22 kb) [file 12881_2018_670_MOESM2_ESM.xlsx]

## Sheet: Sheet1
Supplemental Table 2. Differentially expressed genes in MuRF1 Tg+ mice challenged with hypoxia.
Probeset ID	Genbank Accession	Gene Name	Gene Symbol	p-value	FDR q-value	Fold-Change
A_51_P209401	NM_001177946	adipogenesis associated Mth938 domain containing	Aamdc	0.00941274	1	-1.22643
A_52_P51671	NM_147219	ATP-binding cassette, sub-family A (ABC1), member 5	Abca5	0.00506902	1	2.37562
A_51_P395281	NM_175497	actin, beta-like 2	Actbl2	0.00442687	1	-4.46795
A_51_P152463	NM_010085	a disintegrin and metallopeptidase domain 26A (testase 3)	Adam26a	0.00324992	1	3.76056
A_51_P303739	NM_178928	actin filament associated protein 1-like 1	Afap1l1	0.00913193	1	-1.2677
A_51_P254425	NM_009644	aryl-hydrocarbon receptor repressor	Ahrr	0.00432584	1	-2.00345
A_52_P568651	NM_145223	Alstrom syndrome 1	Alms1	0.00524663	1	-2.43343
A_51_P520310	NM_007440	arachidonate 12-lipoxygenase	Alox12	0.00742922	1	1.97107
A_52_P316765	NM_009659	arachidonate 12-lipoxygenase, 12R type	Alox12b	0.00329614	1	3.42664
A_52_P464592	AK036242	antagonist of mitotic exit network 1	Amn1	0.00368021	1	-2.8421
A_51_P164504	NM_007469	apolipoprotein C-I	Apoc1	0.00997824	1	1.99578
A_51_P301289	NM_007507	ATP synthase, H+ transporting, mitochondrial F1F0 complex, subunit E	Atp5k	0.00219333	1	-1.25462
A_52_P239912	NM_001012640	cDNA sequence AY761185	AY761185	4.7821e-06	0.0328164	5.49704
A_52_P81324	XR_378456	RIKEN cDNA B230311B06 gene	B230311B06Rik	0.00819619	1	-2.01009
A_51_P492366	NM_007557	bone morphogenetic protein 7	Bmp7	0.000651479	0.83825	-1.96042
A_52_P278354	NM_007557	bone morphogenetic protein 7	Bmp7	0.00387817	1	-2.08917
A_51_P463878	NM_011795	complement component 1, q subcomponent-like 1	C1ql1	0.00169279	1	-1.46927
A_52_P211327	AK048707	RIKEN cDNA C230012O17 gene	C230012O17Rik	0.00405209	1	-1.93886
A_51_P199104	NM_009813	calsequestrin 1	Casq1	0.00289645	1	3.16654
A_52_P358044	NM_001163267	coiled-coil domain containing 147	Ccdc147	0.000752383	0.885103	7.38413
A_52_P479038	NM_182995	centriolar coiled coil protein 110	Ccp110	0.000621741	0.83825	9.89457
A_51_P238722	NM_010740	CD93 antigen	Cd93	0.00095025	0.954282	-3.01706
A_51_P329251	NM_025366	coiled-coil-helix-coiled-coil-helix domain containing 1	Chchd1	0.000485873	0.829035	-1.42623
A_52_P622680	NM_029362	charged multivesicular body protein 4B	Chmp4b	0.00630433	1	1.50013
A_52_P1092709	NM_001290678	cytoplasmic polyadenylation element binding protein 4	Cpeb4	0.000596152	0.83825	1.91964
A_52_P242835	NM_026493	centrosome and spindle pole associated protein 1	Cspp1	0.00323284	1	2.52678
A_51_P287225	NM_010009	cytochrome P450, family 27, subfamily b, polypeptide 1	Cyp27b1	1.06586e-06	0.0109715	5.27842
A_51_P492339	NM_007813	cytochrome P450, family 2, subfamily b, polypeptide 13	Cyp2b13	0.000191356	0.435681	-7.54236
A_51_P203720	NM_001033258	DNA segment, Chr 10, Brigham & Women's Genetics 1379 expressed	D10Bwg1379e	0.000928382	0.954282	1.51331
A_52_P434779	NM_027725	dynein assembly factor with WDR repeat domains 1	Daw1	0.00548057	1	-1.7252
A_52_P432787	NM_026794	differentially expressed in B16F10 1	Deb1	0.00502502	1	-1.19987
A_51_P119715	NM_026794	differentially expressed in B16F10 1	Deb1	0.00523634	1	-1.23165
A_51_P122649	NM_027299	degenerative spermatocyte homolog 2 (Drosophila), lipid desaturase	Degs2	0.00760497	1	4.49183
A_52_P129624	NM_177914	diacylglycerol kinase kappa	Dgkk	3.26175e-09	0.000134299	-6.91051
A_51_P156934	NM_025384	DnaJ (Hsp40) homolog, subfamily C, member 15	Dnajc15	0.00113001	1	-1.2249
A_51_P384243	NM_001007268	dual specificity phosphatase 13	Dusp13	0.000340491	0.700969	2.67348
A_52_P486051	AK042791	RIKEN cDNA E230015B07 gene	E230015B07Rik	0.00512533	1	2.10489
A_52_P114620	NM_172760	engulfment and cell motility 3	Elmo3	0.0071291	1	1.36469
A_51_P148512	AK079640	Erbb2 interacting protein	Erbb2ip	0.00420286	1	3.44072
A_51_P502357	NM_177838	family with sequence similarity 163, member A	Fam163a	0.0055079	1	2.10682
A_52_P59970	AK084861	family with sequence similarity 174, member A	Fam174a	0.00485938	1	-2.86224
A_52_P388001	AK034081	family with sequence similarity 20, member B	Fam20b	0.00217972	1	-1.98421
A_52_P158800	NM_010207	fibroblast growth factor receptor 2	Fgfr2	0.00575582	1	-2.9397
A_52_P307628	NM_028767	forkhead box P4	Foxp4	0.0039699	1	2.218
A_51_P307559	NM_001142965	ferric-chelate reductase 1 like	Frrs1l	0.00268592	1	9.45143
A_52_P548202	XR_406047	predicted gene 10030	Gm10030	0.00221838	1	1.80043
A_51_P304988	AJ319753	predicted gene 1549	Gm1549	0.00865831	1	-1.71943
A_52_P287313	NM_001145637	predicted gene 1661	Gm1661	0.00701986	1	-2.19166
A_52_P461967	AK138307	predicted gene, 17473	Gm17473	0.00108744	1	2.73121
A_52_P883511	AK037270	predicted gene, 20149	Gm20149	0.00962439	1	-2.765
A_51_P442829	AK045104	predicted gene 3474	Gm3474	0.00700895	1	-2.54843
A_52_P947847	AK041062	predicted gene 4951	Gm4951	0.00854175	1	-1.98864
A_52_P557395	NR_036449	predicted gene 5084	Gm5084	0.00365959	1	-6.25366
A_52_P461915	AK040832	guanylyl cyclase domain containing 1	Gucd1	0.000104844	0.319825	-4.207
A_51_P184062	NM_019702	Hbs1-like (S. cerevisiae)	Hbs1l	0.00422379	1	-1.21961
A_51_P243435	NM_010475	hydroxysteroid (17-beta) dehydrogenase 1	Hsd17b1	0.00799945	1	2.7167
A_52_P177054	NM_016971	interleukin 22	Il22	0.00432932	1	3.01783
A_51_P193230	NM_028708	janus kinase and microtubule interacting protein 3	Jakmip3	0.00703909	1	3.02291
A_51_P404385	XM_006496250	KAT8 regulatory NSL complex subunit 1-like	Kansl1l	0.00871219	1	3.53769
A_51_P235139	NM_028202	kelch-like 40	Klhl40	0.00550658	1	1.54542
A_52_P625912	NM_153094	killer cell lectin-like receptor subfamily B member 1F	Klrb1f	0.00209712	1	2.30399
A_52_P108698	XM_006516441	NADH dehydrogenase [ubiquinone] 1 beta subcomplex subunit 1-like	LOC102631912	0.0058435	1	-1.25432
A_52_P457700	XM_006508938	DNA-directed RNA polymerase II subunit RPB1-like	LOC102633932	4.97118e-07	0.00682278	4.90587
A_51_P483366	XR_385099	uncharacterized LOC102634881	LOC102634881	0.00972297	1	2.78237
A_51_P463262	AK083204	uncharacterized LOC102638038	LOC102638038	0.00854504	1	-5.96506
A_52_P980091	XR_378074	uncharacterized LOC102640808	LOC102640808	0.00999988	1	2.02618
A_52_P1035989	XR_401670	uncharacterized LOC102641904	LOC102641904	0.00848878	1	7.62043
A_52_P980532	AK081638	uncharacterized LOC628062	LOC628062	0.000108747	0.319825	-3.20806
A_52_P112875	NM_028973	leucine rich repeat containing 15	Lrrc15	6.37608e-05	0.262529	-2.87664
A_51_P475930	NM_028025	melanoma antigen family B, 16	Mageb16	0.00509226	1	-3.45688
A_51_P472879	D16492	mannan-binding lectin serine peptidase 1	Masp1	0.000577617	0.83825	2.51907
A_52_P564003	AK134975	membrane bound O-acyltransferase domain containing 7	Mboat7	0.00325003	1	3.50297
A_52_P231545	AK083618	minichromosome maintenance deficient 4 homolog (S. cerevisiae)	Mcm4	0.000473365	0.829035	-2.63961
A_51_P209234	NM_177855	mediator complex subunit 12-like	Med12l	0.00210298	1	-2.0922
A_52_P507310	NM_026080	mitochondrial ribosomal protein S24	Mrps24	0.00202479	1	-1.25921
A_51_P423030	NM_054081	metastasis associated 1	Mta1	0.00790506	1	-1.2097
A_51_P375538	M16449	myeloblastosis oncogene	Myb	0.00973491	1	2.47524
A_51_P416858	NM_021285	myosin, light polypeptide 1	Myl1	0.00052777	0.835785	3.88745
A_52_P273120	NM_001113387	myosin, light polypeptide 1	Myl1	0.00182282	1	3.70618
A_52_P382754	NM_010875	neural cell adhesion molecule 1	Ncam1	0.00487418	1	1.6153
A_51_P462364	NM_019681	neuronal calcium sensor 1	Ncs1	0.00770546	1	3.28
A_52_P685828	NM_010888	NADH dehydrogenase (ubiquinone) Fe-S protein 6	Ndufs6	0.008962	1	-1.22253
A_51_P429308	NM_001081324	neuropilin (NRP) and tolloid (TLL)-like 2	Neto2	0.00432519	1	1.91521
A_52_P331829	NM_182716	neurofascin	Nfasc	0.00613437	1	-2.16736
A_51_P477418	AK003826	nuclear factor I/C	Nfic	0.00312911	1	1.28509
A_51_P477419	NM_008688	nuclear factor I/C	Nfic	0.00573702	1	1.25829
A_51_P170823	NM_019867	neuronal guanine nucleotide exchange factor	Ngef	0.00921527	1	1.68611
A_51_P479043	NM_022988	Ngg1 interacting factor 3-like 1 (S. pombe)	Nif3l1	0.00656197	1	-1.27678
A_51_P187902	BC021355	NOP56 ribonucleoprotein	Nop56	0.00351842	1	-1.22965
A_52_P232590	NM_147097	olfactory receptor 628	Olfr628	0.00768417	1	-3.90835
A_51_P398859	NM_146751	olfactory receptor 648	Olfr648	0.00477483	1	1.60698
A_52_P640323	NM_013620	olfactory receptor 68	Olfr68	0.00134058	1	-5.63614
A_51_P243187	NM_146599	olfactory receptor 697	Olfr697	0.00526912	1	2.91881
A_51_P245485	NM_181848	optineurin	Optn	0.00352374	1	-1.5384
A_51_P190281	NM_008765	origin recognition complex, subunit 2	Orc2	0.000890566	0.954282	-1.3028
A_52_P49518	NM_031875	otoferlin	Otof	0.00975766	1	-2.38865
A_52_P423238	NM_008821	plasmacytoma expressed transcript 2	Pet2	0.00767946	1	-3.42575
A_52_P129401	AK035083	paired-like homeodomain transcription factor 2	Pitx2	0.00813972	1	-3.49297
A_51_P362501	AK049063	phospholipase A2, group IVE	Pla2g4e	0.00684293	1	-2.5592
A_52_P678942	NM_001159521	plexin B2	Plxnb2	0.00436791	1	1.20808
A_51_P246754	NM_134021	pyridoxine 5'-phosphate oxidase	Pnpo	0.00396269	1	-1.24489
A_52_P566030	NM_025901	polymerase (RNA) III (DNA directed) polypeptide K	Polr3k	0.00434676	1	-1.19084
A_52_P318281	XM_006522955	POU domain, class 1, transcription factor 1	Pou1f1	0.00778759	1	-2.23942
A_51_P444364	AK039639	POU domain, class 4, transcription factor 3	Pou4f3	0.00524905	1	2.04989
A_52_P666754	NM_181595	protein phosphatase 1, regulatory (inhibitor) subunit 9A	Ppp1r9a	0.000501483	0.829035	2.00353
A_51_P298538	NM_145404	protein arginine N-methyltransferase 7	Prmt7	0.000728974	0.882788	-1.17051
A_52_P707884	AK086563	prostaglandin F receptor	Ptgfr	0.00436499	1	1.93792
A_52_P459168	AK047640	protein tyrosine phosphatase, receptor type, U	Ptpru	6.93253e-06	0.0407771	5.59011
A_52_P599789	NM_001033267	glutamine rich 2	Qrich2	0.00273199	1	4.35271
A_52_P196373	AK035603	RAB3 GTPase activating protein subunit 1	Rab3gap1	0.00427185	1	3.70434
A_52_P385824	NM_013661	sema domain, seven thrombospondin repeats (type 1 and type 1-like), transmembrane domai	Sema5b	0.00702455	1	-2.33582
A_52_P260971	AK053400	SH3-domain GRB2-like (endophilin) interacting protein 1	Sgip1	0.00822716	1	1.8418
A_51_P466633	NM_011391	solute carrier family 16 (monocarboxylic acid transporters), member 7	Slc16a7	0.00450521	1	-2.18314
A_51_P415531	AK041736	solute carrier organic anion transporter family, member 5A1	Slco5a1	0.00288959	1	-3.96236
A_52_P634176	AK087772	SRY (sex determining region Y)-box 5	Sox5	0.00154932	1	-2.27873
A_52_P238523	NM_183147	shadow of prion protein	Sprn	0.00173205	1	1.81579
A_51_P459894	NM_011469	small proline-rich protein 2B	Sprr2b	4.43292e-06	0.0328164	4.53034
A_51_P355014	NM_011471	small proline-rich protein 2E	Sprr2e	0.000806251	0.922127	4.22447
A_51_P411316	NM_011477	small proline-rich protein 2K	Sprr2k	0.000879994	0.954282	2.4314
A_52_P1035822	AK035189	serine/threonine kinase 32A	Stk32a	0.00064881	0.83825	-1.7955
A_52_P124429	NM_016665	stimulated by retinoic acid 13	Stra13	0.00708388	1	-1.21091
A_52_P571896	AK034997	SV2 related protein homolog (rat)-like	Svopl	0.00560484	1	-4.55741
A_51_P488910	NM_001042699	spectrin repeat containing, nuclear envelope family member 3	Syne3	0.00985463	1	-1.73428
A_52_P149521	NM_172804	synaptotagmin XVI	Syt16	0.0075244	1	5.96778
A_52_P547187	NM_138667	TGF-beta activated kinase 1/MAP3K7 binding protein 2	Tab2	0.00358494	1	-1.13575
A_51_P347713	NM_020024	TAF10 RNA polymerase II, TATA box binding protein (TBP)-associated factor	Taf10	0.00980978	1	-1.11798
A_51_P393014	NM_026469	testis expressed 13A	Tex13a	0.00681265	1	-4.2202
A_52_P682990	NM_025616	translocase of inner mitochondrial membrane 50	Timm50	0.00827465	1	-1.23761
A_51_P197064	NM_028927	transketolase-like 2	Tktl2	0.0055573	1	-2.60385
A_51_P221852	NM_010744	transmembrane emp24 domain containing 1	Tmed1	0.00302489	1	-1.48294
A_52_P523330	NM_027215	transmembrane protein 147	Tmem147	0.00233419	1	-1.25669
A_52_P378959	NM_001008973	transmembrane protein 232	Tmem232	0.00824263	1	2.18147
A_52_P121978	NM_138751	transmembrane protein 47	Tmem47	0.00846152	1	-1.26377
A_52_P1195619	AK020752	transmembrane protein 86B	Tmem86b	0.00798487	1	-3.43777
A_51_P108183	NM_022322	tenomodulin	Tnmd	0.00936627	1	3.01623
A_52_P294948		translocating chain-associating membrane protein 2	Tram2	0.00794924	1	3.39622
A_51_P467349	AK048725	tripartite motif-containing 62	Trim62	0.00530188	1	-2.14279
A_51_P176811	NM_145363	tetraspanin 10	Tspan10	0.0014402	1	-3.34205
A_51_P457617	NM_026132	thioredoxin domain containing 8	Txndc8	0.00192502	1	-2.08468
A_51_P267080	NM_138302	thymidine phosphorylase	Tymp	0.00968824	1	-1.18256
A_51_P459479	NM_001029873	unc-13 homolog A (C. elegans)	Unc13a	0.00677904	1	2.90613
A_51_P174773	NM_026063	ubiquinol-cytochrome c reductase complex assembly factor 2	Uqcc2	0.00850228	1	-1.22925
A_51_P109766	NM_009503	valosin containing protein	Vcp	0.0040036	1	1.211
A_51_P207054	NM_134227	vomeronasal 1 receptor 87	Vmn1r87	0.0022269	1	-2.65096
A_52_P536768	AK015152	WD repeat domain 66	Wdr66	0.00620531	1	-1.656
A_52_P559485	NM_001033261	zinc finger, C3H1-type containing	Zfc3h1	0.00608452	1	-1.77578
A_52_P598224	NM_175751	zinc finger protein 608	Zfp608	0.00696865	1	1.35323
A_52_P415305	U29499	zinc finger protein 7	Zfp7	0.0018025	1	2.8594
A_51_P320190	NM_001081065	zinc finger protein 707	Zfp707	0.00771684	1	-1.2018
A_52_P136592	NM_173429	zinc finger protein 775	Zfp775	0.00750445	1	4.03251
